# Supplementary material
Source: PubMed Central journal article supplement (PMC7665809)
Supplement: NIHMS1642183-supplement-Supplemental_figure_1.pdf [file NIHMS1642183-supplement-Supplemental_figure_1.pdf]

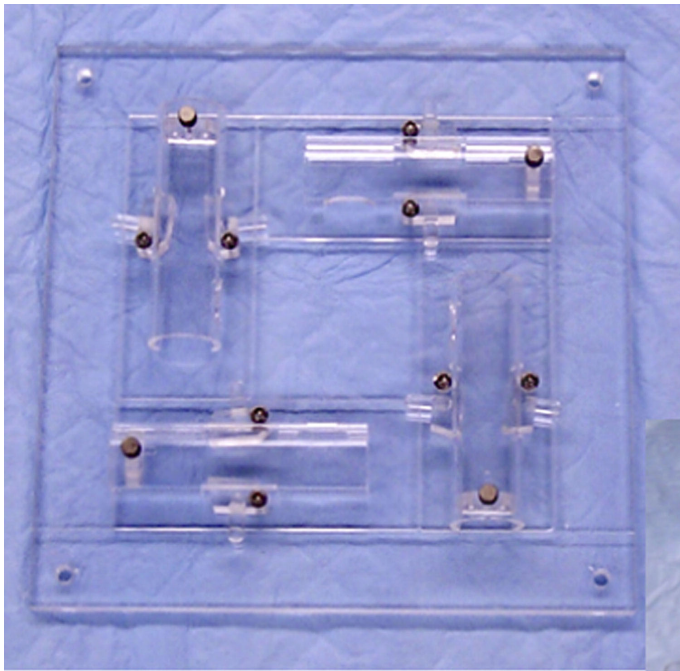

Leg pulled through hole on right, foot taped to lucite plate, tail taped to holder out of radiation field

Large holder

Small holder

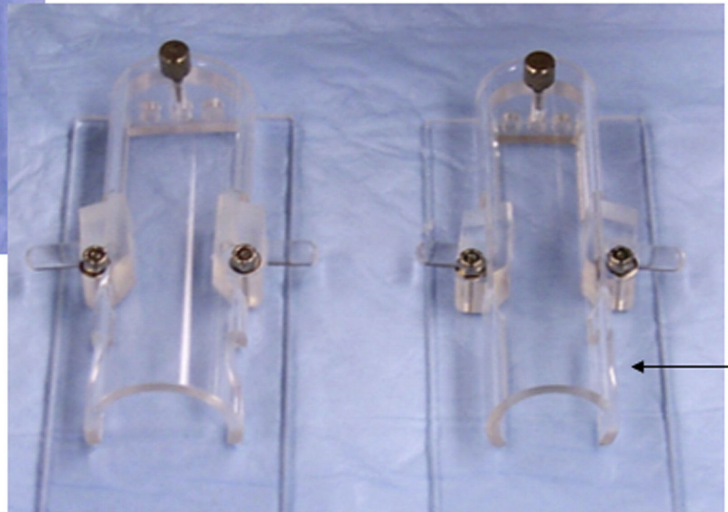

Figure E1
