# Supplementary material
Source: PubMed Central journal article supplement (PMC7665809)

## Quantification c-Met KD at 48 hours

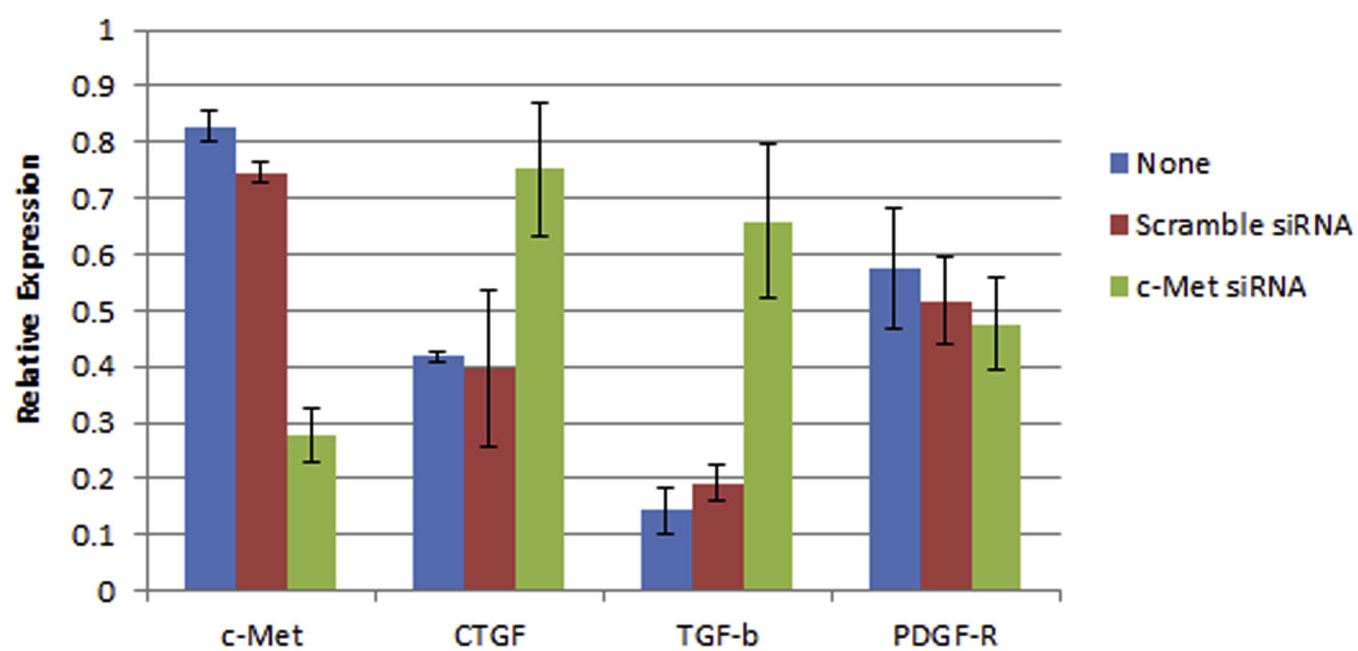

Figure E2

Supplement: NIHMS1642183-supplement-Supplemental_figure_2.pdf [file NIHMS1642183-supplement-Supplemental_figure_2.pdf]
